# Supplementary material for: Molecular Glues: The Adhesive Connecting Targeted Protein Degradation to the Clinic
Source: PubMed Central journal article supplement (PMC9910052; doi:10.1021/acs.biochem.2c00245), 2022-07-20
Supplement: bi2c00245_si_001.pdf [file bi2c00245_si_001.pdf]

# Supporting Information

## Molecular glues: The adhesive connecting targeted protein degradation to the clinic

Janet M. Sasso, Rumiana Tenchov, DaSheng Wang, Linda S. Johnson,  
Xinmei Wang, Qiongqiong Angela Zhou\*

CAS, a division of the American Chemical Society, 2540 Olentangy River Rd, Columbus, OH  
43202, USA

### Contents:

Figure S1. ChemScape map of compounds within 90% similarity limit to thalidomide used as protein degraders according to SciFinder<sup>n</sup>.

Figure S2. Bioactivity Indicators of the 310 compounds within the 85% - 99% chemical structure similarity range to the molecular glue CC-885 as estimated using SciFinder<sup>n</sup>.

Figure S3. Bioactivity Indicators of 715 Compounds with an  $\alpha,\alpha$ -Difluorobenzeneacetamide CC-885 analog chemical substructure as estimated using SciFinder<sup>n</sup>.

Chemscape map of compounds within 90% similarity limit to thalidomide used as protein degraders (SciFinder<sup>n</sup>)

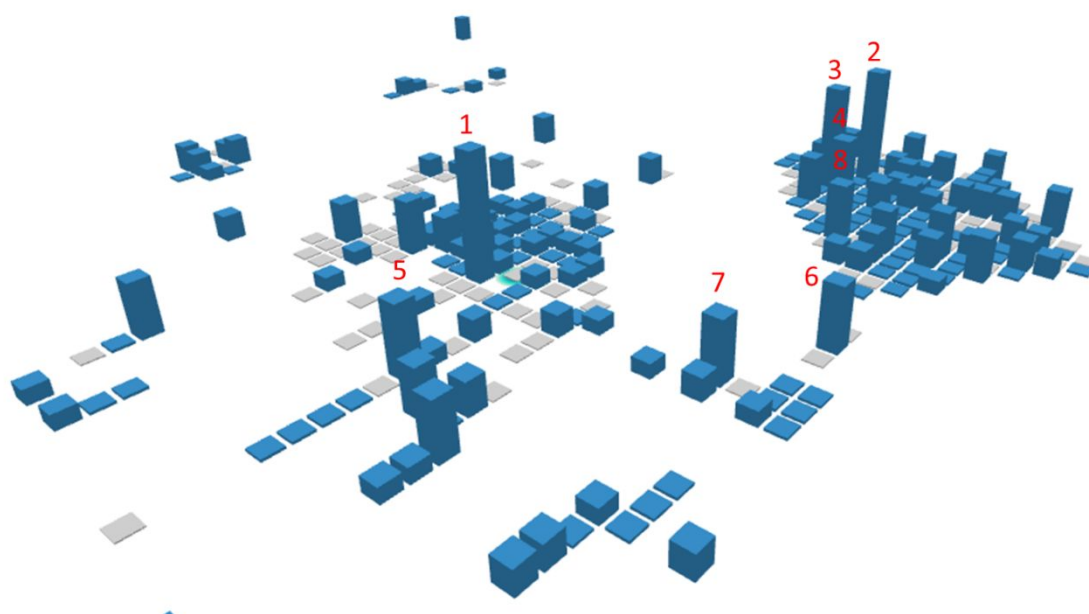

|   | Compound CAS #                | Structure                                                                           | Number of patents |
|---|-------------------------------|-------------------------------------------------------------------------------------|-------------------|
| 1 | 50-35-1<br>(thalidomide)      |  | 1,060             |
| 2 | 191732-72-6<br>(lenalidomide) |  | 962               |
| 3 | 19171-19-8<br>(pomalidomide)  |  | 496               |
| 4 | 5054-59-1                     |  | 104               |
| 5 | 64567-60-8                    |  | 39                |
| 6 | 1061604-41-8                  |  | 28                |
| 7 | 191732-76-0                   |  | 24                |
| 8 | 191732-70-4                   |  | 23                |

Figure S1. A search in SciFinder<sup>n</sup> for compounds within the 90% similarity limit to thalidomide used as protein degraders gave 219 compounds. Each column on the figure reflects a single compound, with the top 8 indicated by numbers. The distance between two columns reflects the similarity between these two compounds. The bar height reflects the number of patents related to a given compound. The table on the right lists the top 8 compounds of this collection.

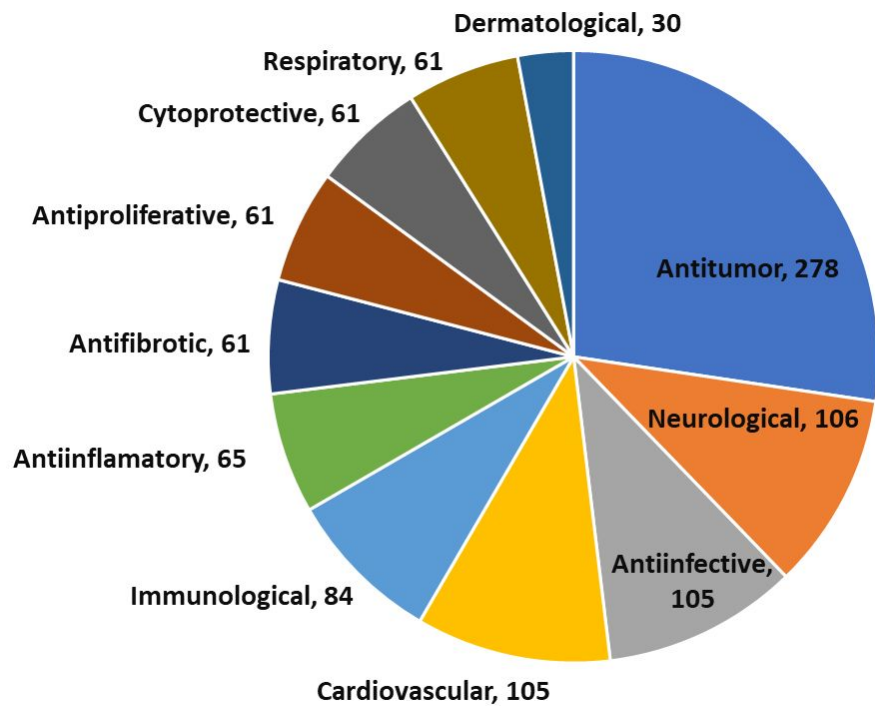

Figure S2. Bioactivity Indicators of the 310 compounds within the 85% - 99% chemical structure similarity range to the molecular glue CC-885 as estimated using SciFinder<sup>n</sup>. The bioactivity indicators are common for multiple compounds.

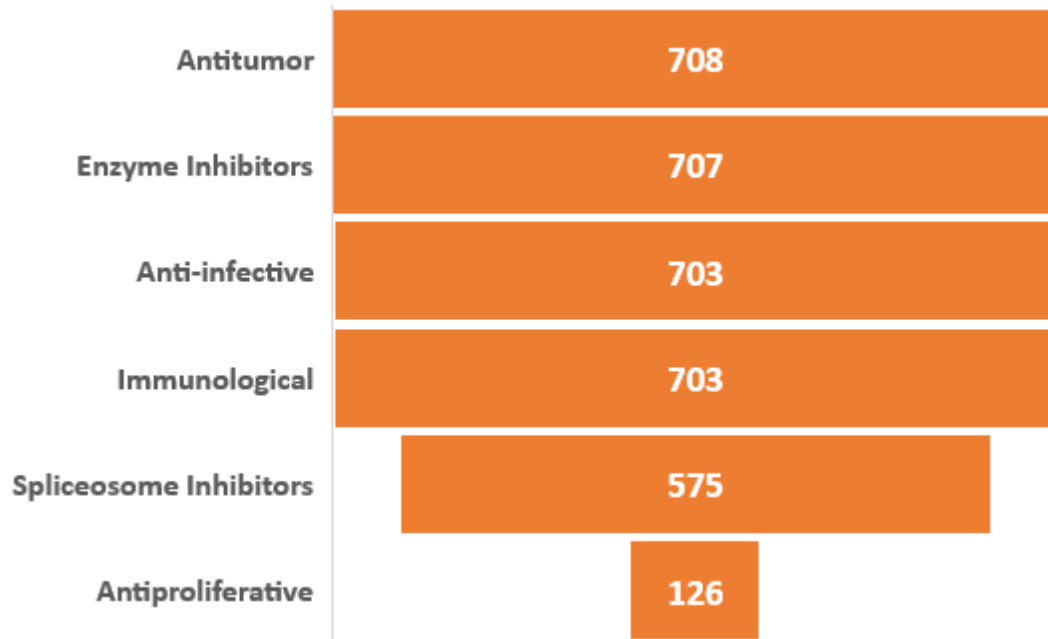

Figure S3. Bioactivity Indicators of the 715 Compounds with an  $\alpha,\alpha$ -Difluorobenzeneacetamide CC-885

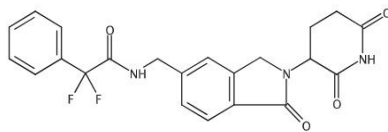

analog chemical substructure:  
bioactivity indicators are common for multiple compounds.

as estimated using SciFinder<sup>®</sup>. The
